# Supplementary material
Source: publisher figshare collection journal article supplement (https://geolsoc.figshare.com/ndownloader/files/5423192)
Supplement: Supplementary file 1 [file 5423192]

Sample no	Mineral				J	± (1s)	% error		Int Age (Ma)	± (2s)	with ± in J		Plateau Age	± (2s)	with ± in J	MSWD	% 39Ar
HF-08-15e	Amp				0.015279	0.000023	0.15		452.2	1.3	2		442.7	1.5	2	0.1	55.7
Step no	Power	39Ar (10^-13 mV)	±	40Ar/39Ar	±	38Ar/39Ar	±	37Ar/39Ar	±	36Ar/39Ar	±	40Ar*/39Ar(K)	±	40Ar*	Cumulative	Age	±	Ca/K	±	Cl/K	±
	(%)		(1s)		(1s)		(1s)		(1s)		(1s)		(1s)	(%)	39Ar (%)	(Ma)	(1s)		(1s)		(1s)
1	1.0	8.273	0.162	211.941	4.151	0.407	0.026	1.216	0.098	0.060	0.011	194.359	4.960	91.626	0.216	2487.226	34.441	2.226	0.207	0.088	0.010
2	1.5	4.888	0.131	21.362	0.604	0.109	0.031	1.038	0.142	0.018	0.021	15.978	6.362	74.743	0.344	394.081	140.946	1.900	0.274	0.021	0.007
3	2.0	7.917	0.151	20.799	0.415	0.111	0.021	1.273	0.109	0.010	0.010	18.030	3.017	86.609	0.551	438.965	65.208	2.331	0.226	0.022	0.005
4	2.5	47.867	0.390	20.765	0.174	0.245	0.005	2.572	0.036	0.003	0.002	20.221	0.550	97.203	1.804	485.712	11.586	4.716	0.229	0.053	0.005
5	3.0	338.726	0.845	19.118	0.049	0.237	0.002	2.615	0.013	0.001	0.000	19.011	0.084	99.258	10.672	460.053	1.803	4.794	0.224	0.051	0.004
6	3.3	466.001	1.227	18.532	0.050	0.232	0.002	2.584	0.013	0.001	0.000	18.493	0.079	99.605	22.871	448.944	1.699	4.738	0.221	0.050	0.004
7	3.5	529.017	1.325	18.223	0.046	0.232	0.001	2.601	0.010	0.001	0.000	18.175	0.066	99.558	36.720	442.113	1.418	4.768	0.222	0.050	0.004
8	4.0	642.550	1.437	18.303	0.042	0.228	0.001	2.582	0.010	0.001	0.000	18.209	0.057	99.306	53.541	442.834	1.226	4.733	0.221	0.049	0.004
9	5.0	956.298	2.187	18.318	0.043	0.233	0.001	2.547	0.012	0.001	0.000	18.214	0.056	99.253	78.575	442.937	1.200	4.669	0.218	0.050	0.004
10	7.0	818.402	1.730	17.892	0.039	0.225	0.001	2.583	0.010	0.001	0.000	17.874	0.055	99.717	100.000	435.599	1.189	4.735	0.221	0.049	0.004
Average of total blank (ms and extraction blanks)				40Ar	± (1s)	39Ar	± (1s)	38Ar	± (1s)	37Ar	± (1s)	36Ar	± (1s)
(10^-13 mV)				43.49	0.64	0.40	0.09	0.10	0.16	0.76	0.12	0.42	0.08
Sample no	Mineral				J	± (1s)	% error		Int Age (Ma)	± (2s)	with ± in J		Plateau Age	± (2s)	with ± in J	MSWD	% 39Ar
HF-08-15c	Amp				0.015004	0.000025	0.17		452.6	1.0	2		413.6	1.3	2	2.8	36.7
Step no	Power	39Ar (10^-13 mV)	±	40Ar/39Ar	±	38Ar/39Ar	±	37Ar/39Ar	±	36Ar/39Ar	±	40Ar*/39Ar(K)	±	40Ar*	Cumulative	Age	±	Ca/K	±	Cl/K	±	Data does not yield a flat age spectrum
	(%)		(1s)		(1s)		(1s)		(1s)		(1s)		(1s)	(%)	39Ar (%)	(Ma)	(1s)		(1s)		(1s)
1	1.0	1662.638	4.335	24.651	0.065	0.027	0.001	0.021	0.002	0.008	0.000	22.115	0.082	89.711	19.022	516.936	1.670	0.039	0.005	0.003	0.000
2	1.3	443.981	1.089	22.573	0.057	0.025	0.001	0.028	0.003	0.001	0.000	22.172	0.079	98.221	24.101	518.099	1.609	0.051	0.006	0.003	0.000
3	1.5	136.735	0.551	22.637	0.094	0.029	0.001	0.122	0.010	0.003	0.001	21.796	0.178	96.278	25.666	510.451	3.637	0.224	0.020	0.003	0.000
4	2.0	334.984	0.877	21.083	0.057	0.067	0.001	1.541	0.011	0.002	0.000	20.468	0.086	96.977	29.502	483.161	1.775	2.822	0.133	0.012	0.001
5	2.5	1491.359	2.759	19.626	0.037	0.090	0.001	2.544	0.012	0.002	0.000	19.351	0.054	98.420	46.595	459.864	1.136	4.664	0.218	0.018	0.002
6	2.8	1457.361	2.899	17.783	0.036	0.094	0.001	2.687	0.012	0.002	0.000	17.561	0.049	98.565	63.300	421.930	1.057	4.926	0.230	0.018	0.002
7	3.0	1256.826	2.483	17.374	0.035	0.095	0.001	2.731	0.011	0.001	0.000	17.205	0.056	98.838	77.706	414.279	1.212	5.007	0.233	0.019	0.002
8	3.3	423.393	1.019	17.421	0.043	0.097	0.001	2.733	0.015	0.002	0.000	17.203	0.070	98.558	82.560	414.235	1.504	5.011	0.234	0.019	0.002
9	3.8	597.717	1.402	17.089	0.041	0.097	0.001	2.752	0.013	0.001	0.000	16.995	0.060	99.256	89.411	409.759	1.305	5.046	0.236	0.019	0.002
10	4.5	165.340	0.590	17.393	0.064	0.094	0.002	2.710	0.028	0.001	0.000	17.306	0.152	99.309	91.306	416.446	3.273	4.968	0.237	0.018	0.002
11	7.0	758.410	1.331	17.311	0.032	0.094	0.001	2.781	0.013	0.001	0.000	17.223	0.047	99.295	100.000	414.666	1.009	5.100	0.238	0.019	0.002
Average of total blank (ms and extraction blanks)				40Ar	± (1s)	39Ar	± (1s)	38Ar	± (1s)	37Ar	± (1s)	36Ar	± (1s)
(10^-13 mV)				40.66	0.82	0.30	0.10	0.20	0.08	0.76	0.10	0.36	0.06
Sample no	Mineral				J	± (1s)	% error		Int Age (Ma)	± (2s)	with ± in J		Plateau Age	± (2s)	with ± in J	MSWD	% 39Ar
HF-08-15c	Ann				0.015028	0.000023	0.15		583.1	5.5	6		597.0	4.7	5	1.6	84.8
Step no	Power	39Ar (10^-13 mV)	±	40Ar/39Ar	±	38Ar/39Ar	±	37Ar/39Ar	±	36Ar/39Ar	±	40Ar*/39Ar(K)	±	40Ar*	Cumulative	Age	±	Ca/K	±	Cl/K	±
	(%)		(1s)		(1s)		(1s)		(1s)		(1s)		(1s)	(%)	39Ar (%)	(Ma)	(1s)		(1s)		(1s)
1	1.8	4.443	0.178	742.430	29.596	0.508	0.045	3.061	6.093	2.524	0.112	0.000	14.459	0.000	0.533	0.010	392.011	5.613	11.178	0.005	0.010
2	1.8	60.186	0.530	42.151	0.375	0.040	0.003	0.000	0.484	0.072	0.002	20.982	0.725	49.777	7.738	494.448	14.936	0.000	0.886	0.003	0.001
3	2.2	121.395	0.754	26.950	0.172	0.024	0.002	0.028	0.264	0.004	0.001	25.826	0.260	95.826	22.271	591.639	5.083	0.052	0.484	0.002	0.000
4	2.2	201.326	1.293	26.451	0.172	0.024	0.002	0.127	0.129	0.001	0.000	26.140	0.198	98.814	46.373	597.752	3.863	0.232	0.237	0.002	0.000
5	2.3	130.279	0.958	26.844	0.200	0.023	0.002	0.030	0.195	0.001	0.001	26.412	0.278	98.389	61.970	603.046	5.403	0.055	0.358	0.002	0.000
6	2.4	96.602	0.902	26.752	0.253	0.024	0.002	0.090	0.287	0.001	0.001	26.560	0.334	99.279	73.535	605.926	6.472	0.164	0.526	0.002	0.000
7	2.6	81.498	0.623	26.746	0.210	0.025	0.002	0.035	0.351	0.001	0.001	26.387	0.348	98.655	83.291	602.565	6.754	0.064	0.642	0.003	0.001
8	2.9	53.734	0.650	25.924	0.318	0.026	0.003	0.000	0.519	0.002	0.002	25.380	0.551	97.903	89.724	582.906	10.820	0.000	0.951	0.003	0.001
9	3.2	23.324	0.421	24.882	0.455	0.024	0.005	0.000	1.132	0.002	0.003	24.297	1.067	97.649	92.516	561.521	21.184	0.001	2.072	0.002	0.001
10	7.0	62.513	0.554	23.776	0.215	0.025	0.003	0.155	0.440	0.001	0.001	23.361	0.376	98.245	100.000	542.848	7.544	0.283	0.806	0.002	0.001
Average of total blank (ms and extraction blanks)				40Ar	± (1s)	39Ar	± (1s)	38Ar	± (1s)	37Ar	± (1s)	36Ar	± (1s)
(10^-13 mV)				60.09	0.69	0.38	0.07	0.20	0.06	0.97	0.15	0.44	0.05
Sample no	Mineral				J	± (1s)	% error		Int Age (Ma)	± (2s)	with ± in J		Plateau Age	± (2s)	with ± in J	MSWD	% 39Ar
HF-08-16	Ms				0.015035	0.000023	0.15		320.2	1.6	2		318.6	1.9	2	2.3	69.4
Step no	Power	39Ar (10^-13 mV)	±	40Ar/39Ar	±	38Ar/39Ar	±	37Ar/39Ar	±	36Ar/39Ar	±	40Ar*/39Ar(K)	±	40Ar*	Cumulative	Age	±	Ca/K	±	Cl/K	±	Data yield a flat isochron
	(%)		(1s)		(1s)		(1s)		(1s)		(1s)		(1s)	(%)	39Ar (%)	(Ma)	(1s)		(1s)		(1s)
1	1.5	1.163	0.103	15.514	1.555	0.294	0.089	28.111	20.383	0.061	0.053	0.000	16.079	0.000	0.043	0.010	436.121	52.485	38.153	0.063	0.022
2	1.8	10.571	0.235	13.586	0.330	0.048	0.011	1.435	1.906	0.000	0.006	13.570	1.878	99.778	0.427	334.959	42.318	2.629	3.494	0.008	0.003
3	2.1	34.762	0.444	14.343	0.193	0.016	0.003	0.640	0.570	0.004	0.002	13.124	0.588	91.460	1.689	324.892	13.315	1.173	1.046	0.000	0.001
4	2.3	190.842	1.160	13.548	0.085	0.016	0.001	0.069	0.103	0.001	0.000	13.234	0.127	97.674	8.615	327.377	2.867	0.127	0.189	0.000	0.000
5	2.4	606.442	1.920	13.173	0.043	0.016	0.000	0.020	0.039	0.000	0.000	13.029	0.056	98.908	30.622	322.737	1.264	0.036	0.072	0.000	0.000
6	2.5	478.710	1.725	13.211	0.049	0.015	0.001	0.031	0.045	0.001	0.000	13.033	0.067	98.652	47.994	322.817	1.525	0.057	0.082	0.000	0.000
7	2.6	252.168	1.274	12.999	0.068	0.016	0.001	0.179	0.084	0.001	0.000	12.748	0.104	98.056	57.145	316.350	2.359	0.328	0.155	0.000	0.000
8	2.7	250.158	1.212	12.779	0.064	0.016	0.001	0.120	0.085	0.001	0.000	12.514	0.118	97.920	66.224	311.012	2.697	0.219	0.155	0.000	0.000
9	2.8	245.532	1.215	12.946	0.066	0.015	0.001	0.142	0.110	0.000	0.000	12.812	0.102	98.954	75.135	317.809	2.321	0.260	0.202	0.000	0.000
10	2.9	205.842	0.958	12.870	0.064	0.016	0.001	0.163	0.095	0.001	0.000	12.690	0.135	98.590	82.605	315.033	3.071	0.298	0.174	0.000	0.000
11	3.0	201.738	1.019	12.991	0.068	0.016	0.001	0.077	0.102	0.000	0.000	12.823	0.116	98.701	89.926	318.053	2.632	0.140	0.187	0.000	0.000
12	3.1	197.131	1.045	13.085	0.072	0.015	0.001	0.117	0.123	0.001	0.000	12.903	0.127	98.600	97.080	319.879	2.891	0.215	0.225	0.000	0.000
13	3.3	59.611	0.486	13.652	0.117	0.015	0.002	0.146	0.471	0.001	0.001	13.298	0.388	97.397	99.244	328.827	8.774	0.267	0.862	0.000	0.001
14	3.6	14.519	0.333	15.804	0.370	0.015	0.007	1.619	1.465	0.005	0.005	14.566	1.435	92.061	99.771	357.263	31.940	2.966	2.688	0.000	0.002
15	7.0	6.287	0.171	16.779	0.496	0.009	0.015	3.629	3.217	0.012	0.011	13.627	3.383	81.007	100.000	336.239	76.164	6.659	5.911	0.000	0.003
Average of total blank (ms and extraction blanks)				40Ar	± (1s)	39Ar	± (1s)	38Ar	± (1s)	37Ar	± (1s)	36Ar	± (1s)
(10^-13 mV)				81.41	0.64	0.37	0.05	0.23	0.06	0.81	0.13	0.47	0.05
Sample no	Mineral				J	± (1s)	% error		Int Age (Ma)	± (2s)	with ± in J		Plateau Age	± (2s)	with ± in J	MSWD	% 39Ar
HF-08-15g	Ser				0.015093	0.000021	0.14		217.6	14.4	14		206.1	15.3	15	0.2	66.2
Step no	Power	39Ar (10^-13 mV)	±	40Ar/39Ar	±	38Ar/39Ar	±	37Ar/39Ar	±	36Ar/39Ar	±	40Ar*/39Ar(K)	±	40Ar*	Cumulative	Age	±	Ca/K	±	Cl/K	±
	(%)		(1s)		(1s)		(1s)		(1s)		(1s)		(1s)	(%)	39Ar (%)	(Ma)	(1s)		(1s)		(1s)
1	0.3	0.499	0.124	139.534	34.552	3.144	0.842	4.850	6.384	0.518	0.192	0.000	42.659	0.000	0.212	0.010	1161.547	8.906	11.731	0.700	0.199
2	0.5	3.640	0.171	35.838	1.705	0.352	0.048	2.022	0.775	0.112	0.024	2.936	7.056	8.181	1.754	78.226	183.966	3.705	1.430	0.073	0.013
3	1.0	26.519	0.484	19.997	0.370	0.151	0.011	3.418	0.248	0.035	0.004	10.086	1.107	50.318	12.996	255.642	26.157	6.271	0.541	0.030	0.004
4	1.5	48.860	0.515	11.174	0.123	0.051	0.004	6.288	0.179	0.007	0.002	9.656	0.465	86.035	33.754	245.449	11.048	11.559	0.630	0.008	0.001
5	2.0	58.797	0.719	8.511	0.110	0.026	0.004	4.524	0.142	0.003	0.002	7.972	0.463	93.373	58.701	204.976	11.247	8.306	0.466	0.003	0.001
6	2.5	34.243	0.471	9.195	0.134	0.035	0.005	7.326	0.210	0.007	0.002	7.684	0.620	83.133	73.259	197.960	15.137	13.476	0.736	0.005	0.001
7	3.0	24.168	0.325	9.837	0.144	0.035	0.008	6.039	0.269	0.008	0.003	8.075	0.995	81.739	83.525	207.472	24.142	11.099	0.714	0.005	0.002
8	7.0	38.791	0.567	9.344	0.145	0.027	0.005	5.944	0.262	0.005	0.002	8.343	0.662	88.905	100.000	213.958	16.009	10.923	0.700	0.003	0.001
Average of total blank (ms and extraction blanks)				40Ar	± (1s)	39Ar	± (1s)	38Ar	± (1s)	37Ar	± (1s)	36Ar	± (1s)
(10^-13 mV)				45.96	0.72	0.45	0.09	0.24	0.10	0.92	0.09	0.36	0.05
Sample no	Mineral				J	± (1s)	% error		Int Age (Ma)	± (2s)	with ± in J		Plateau Age	± (2s)	with ± in J	MSWD	% 39Ar
HF-08-16	Ksp				0.015107	0.000021	0.14		184.4	3.9	4		186.5	5.7	6	3.8	56.3
Step no	Power	39Ar (10^-13 mV)	±	40Ar/39Ar	±	38Ar/39Ar	±	37Ar/39Ar	±	36Ar/39Ar	±	40Ar*/39Ar(K)	±	40Ar*	Cumulative	Age	±	Ca/K	±	Cl/K	±
	(%)		(1s)		(1s)		(1s)		(1s)		(1s)		(1s)	(%)	39Ar (%)	(Ma)	(1s)		(1s)		(1s)
1	0.5	32.775	0.316	55.456	0.540	0.361	0.007	0.147	0.050	0.174	0.004	4.001	1.128	7.214	1.851	105.875	28.985	0.268	0.093	0.072	0.006
2	1.0	352.843	0.821	11.393	0.028	0.057	0.001	0.048	0.006	0.017	0.000	6.268	0.113	55.018	21.774	163.228	2.808	0.088	0.012	0.009	0.001
3	1.3	180.902	0.661	11.046	0.042	0.036	0.001	0.166	0.010	0.012	0.001	7.479	0.174	67.706	31.989	193.129	4.263	0.304	0.024	0.005	0.000
4	1.5	122.228	0.484	13.620	0.057	0.061	0.002	0.443	0.018	0.018	0.001	8.453	0.259	62.041	38.893	216.808	6.254	0.810	0.050	0.010	0.001
5	1.8	85.075	0.432	14.598	0.079	0.060	0.002	0.093	0.022	0.022	0.001	8.208	0.361	56.225	43.697	210.890	8.759	0.169	0.041	0.010	0.001
6	2.0	135.382	0.559	20.852	0.089	0.122	0.002	0.100	0.013	0.044	0.001	7.809	0.284	37.449	51.341	201.188	6.920	0.183	0.026	0.023	0.002
7	2.5	197.143	0.808	20.487	0.085	0.146	0.002	0.090	0.010	0.043	0.001	7.775	0.200	37.949	62.473	200.355	4.880	0.164	0.020	0.029	0.003
8	3.0	118.155	0.447	12.891	0.051	0.071	0.002	0.113	0.016	0.019	0.001	7.351	0.253	57.016	69.145	189.975	6.216	0.207	0.032	0.012	0.001
9	3.5	97.704	0.490	12.583	0.066	0.070	0.002	0.098	0.019	0.017	0.001	7.615	0.308	60.513	74.662	196.445	7.519	0.180	0.036	0.012	0.001
10	4.0	73.145	0.429	13.433	0.082	0.082	0.003	0.168	0.023	0.023	0.002	6.698	0.449	49.857	78.793	173.896	11.121	0.307	0.045	0.015	0.001
11	7.0	375.518	1.179	35.970	0.114	0.467	0.003	0.295	0.008	0.099	0.001	6.645	0.232	18.469	100.000	172.572	5.742	0.541	0.030	0.100	0.009
Average of total blank (ms and extraction blanks)				40Ar	± (1s)	39Ar	± (1s)	38Ar	± (1s)	37Ar	± (1s)	36Ar	± (1s)
(10^-13 mV)				52.31	0.69	0.46	0.07	0.26	0.09	0.67	0.11	0.39	0.08
Sample no	Mineral				J	± (1s)	% error		Int Age (Ma)	± (2s)	with ± in J		Plateau Age	± (2s)	with ± in J	MSWD	% 39Ar
HF-08-15	Grt				0.014983	0.000026	0.17
Step no	Power	39Ar (10^-13 mV)	±	40Ar/39Ar	±	38Ar/39Ar	±	37Ar/39Ar	±	36Ar/39Ar	±	40Ar*/39Ar(K)	±	40Ar*	Cumulative	Age	±	Ca/K	±	Cl/K	±
	(%)		(1s)		(1s)		(1s)		(1s)		(1s)		(1s)	(%)	39Ar (%)	(Ma)	(1s)		(1s)		(1s)
1	TF	9.745	0.306	1331.468	36.948	0.214	0.022	149.108	4.526	0.112	0.009	1465.000	46.073	99.158	100.000	5652.755	54.265	304.973	17.505	0.047	0.007
Average of total blank (ms and extraction blanks)				40Ar	± (1s)	39Ar	± (1s)	38Ar	± (1s)	37Ar	± (1s)	36Ar	± (1s)
(10^-13 mV)				41.14	0.52	0.34	0.09	0.25	0.11	0.87	0.10	0.34	0.05
